# Supplementary material for: Synthesis, characterization and antimicrobial activity applications of grafted copolymer alginate-g-poly(N-vinyl imidazole)
Source: PubMed Central journal article supplement (PMC8695916; doi:10.1039/d1ra01874d), 2021-03-19
Supplement: RA-011-D1RA01874D-s001.pdf [file RA-011-D1RA01874D-s001.pdf]

## **Supporting Information**

### **Synthesis, characterization and antimicrobial activity applications of grafted copolymer alginate-g-poly (*N*-vinyl imidazole)**

*Soliman Mehawed Abdellatif Soliman*<sup>1,\*</sup> *Mohamed Fathi Sanad*<sup>3</sup> and *Ahmed  
Esmail Shalan*<sup>2,4\*</sup>

<sup>1</sup> Chemistry Department, Faculty of Science, Cairo University, 12613 Giza, Egypt.

<sup>2</sup> Central Metallurgical Research and Development Institute (CMRDI), P.O. Box 87, Helwan, Cairo 11421, Egypt.

<sup>3</sup> FabLab, Centre for Emerging Learning Technologies (CELT), and Electrical Engineering department, the British University in Egypt (BUE), Cairo 11387, Egypt.

<sup>4</sup> BCMaterials, Basque Center for Materials, Applications and Nanostructures, Martina Casiano, UPV/EHU Science Park, Barrio Sarriena s/n, Leioa 48940, Spain.

\*Corresponding author: (A. E. S.) E-mail: [ahmed.shalan@bcmaterials.net](mailto:ahmed.shalan@bcmaterials.net);  
[a.shalan133@gmail.com](mailto:a.shalan133@gmail.com)  
(S. M. A. S.) E-mail: [sabdellatif@sci.cu.edu.eg](mailto:sabdellatif@sci.cu.edu.eg)

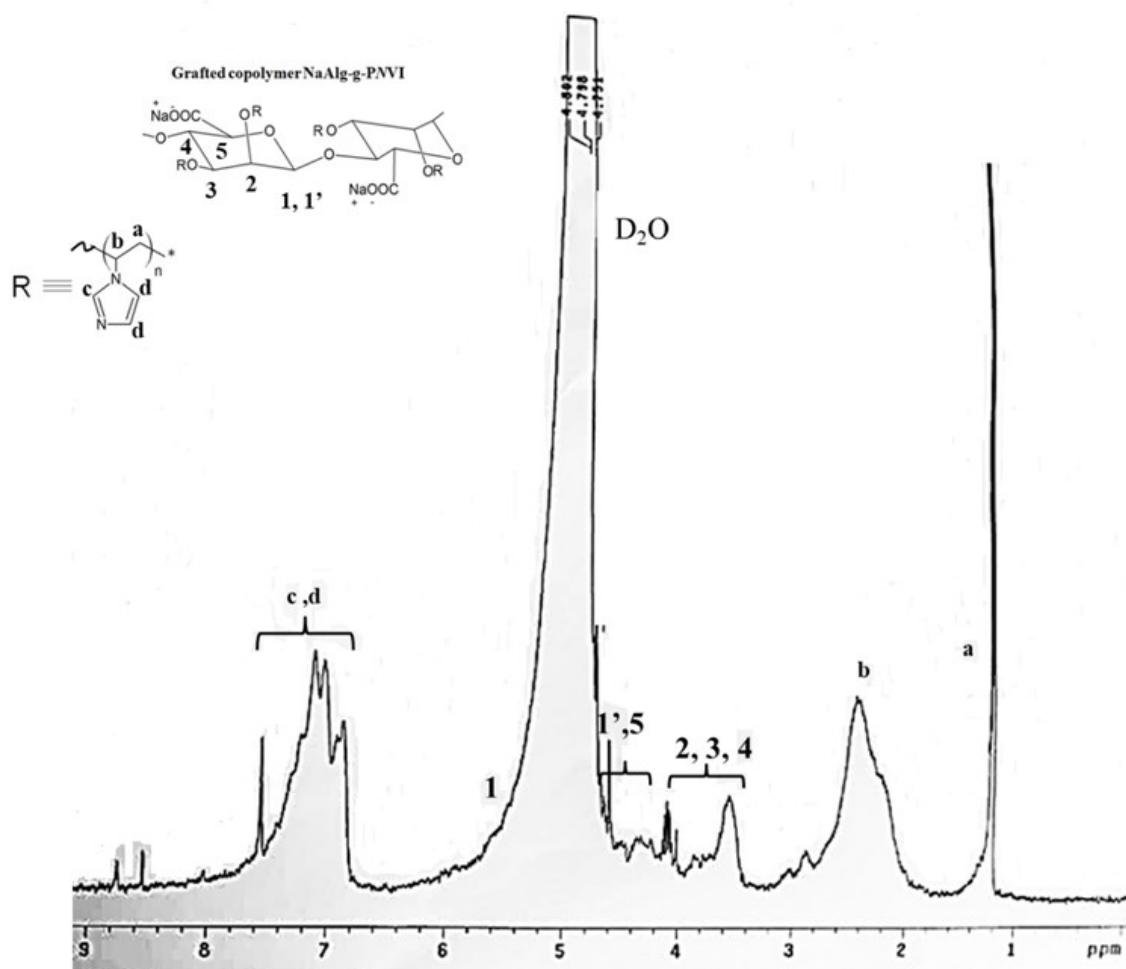

**Figure S1.**  $^1\text{H}$  NMR spectrum of grafted copolymer Alginate-g-PNVI in  $\text{D}_2\text{O}$ .

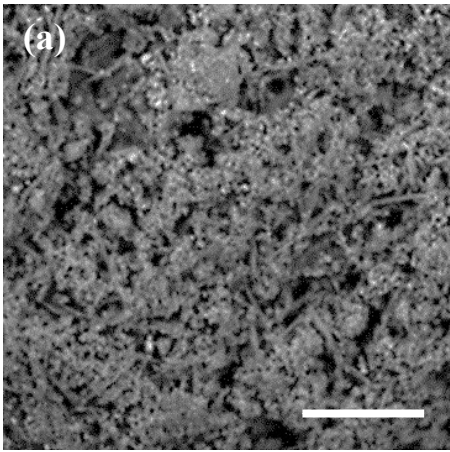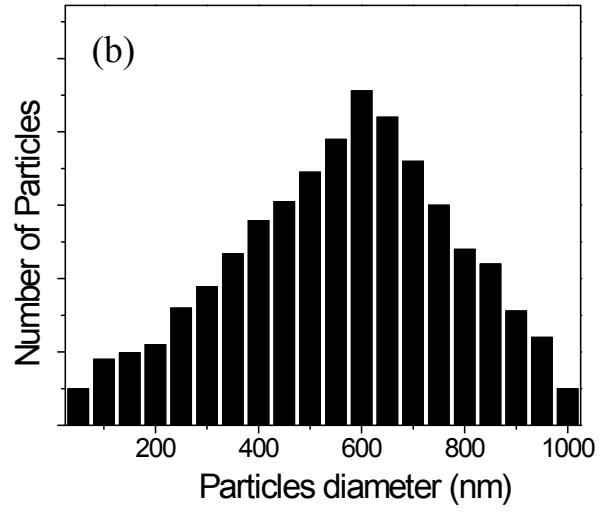

**Figure S2.** (a) SEM pictures and (b) particle size distribution of grafted copolymer NaAlg-g-PNVI
